# Supplementary material
Source: publisher figshare collection journal article supplement (https://acs.figshare.com/ndownloader/files/8627623)
Supplement: Supplementary file 1 [file 8627623]

## Supporting Information

**Cellulose      Fibers      Constructed      Convenient      Recyclable      3D**

### **Graphene-Formicary-like $\delta$ -Bi<sub>2</sub>O<sub>3</sub> Aerogels for the Selective Capture of Iodide**

*Ye Xiong,<sup>†</sup> Baokang Dang,<sup>†</sup> Chao Wang,<sup>†</sup> Hanwei Wang,<sup>†</sup> Shouwei Zhang,<sup>§</sup> Qingfeng Sun,<sup>†,\*</sup> Xijin Xu,<sup>§\*</sup>*

<sup>†</sup>School of Engineering, Zhejiang A & F University, Hangzhou, Zhejiang Province, 311300, PR China

<sup>‡</sup>Key Laboratory of Wood Science and Technology, Zhejiang Province, 311300, PR China

<sup>§</sup>School of Physics and Technology, University of Jinan, Shandong Province, 250022, P.R. China

\*Corresponding author

Qingfeng Sun: E-mail: qfsun@zafu.edu.cn

Xijin Xu: E-mail: sps\_xuxj@ujn.edu.cn

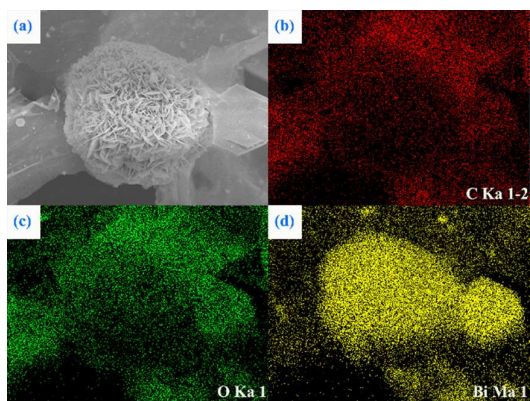

**Figure S1.** SEM Mapping of the as-prepared FL- $\delta$ -Bi<sub>2</sub>O<sub>3</sub> aerogels. (a) SEM image. (b) Carbon mapping. (c) Oxygen mapping. (d) Bismuth mapping.

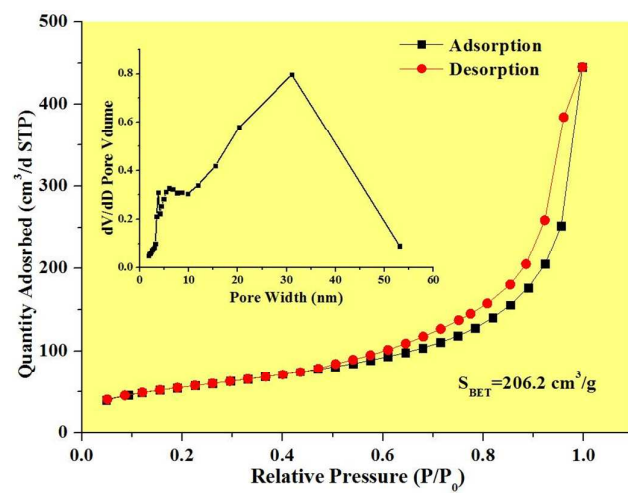

**Figure S2.** N<sub>2</sub> adsorption/desorption isotherm curve for FL- $\delta$ -Bi<sub>2</sub>O<sub>3</sub> aerogels.

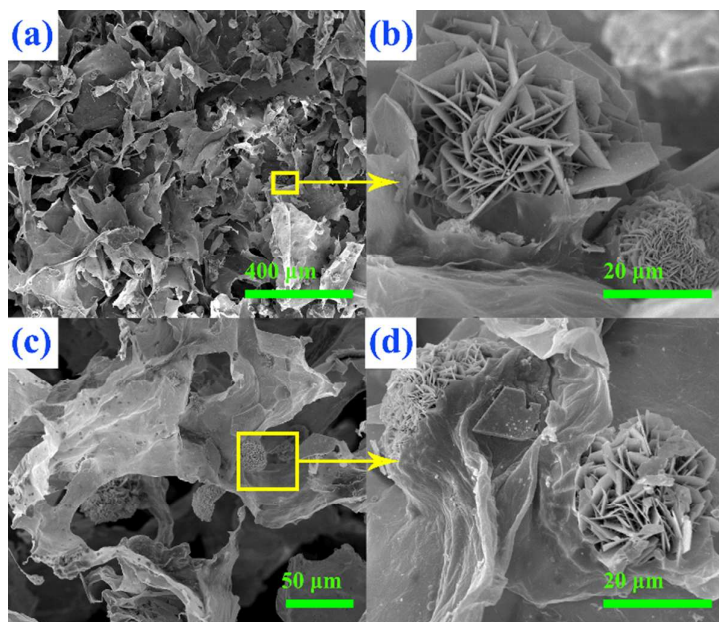

**Figure S3.** The micro-morphology of FL- $\delta$ -Bi<sub>2</sub>O<sub>3</sub> aerogel before and after selectively captured radioactive I<sup>-</sup> anions. (a) and (b) Before the reaction. (c) and (d) After the reaction.

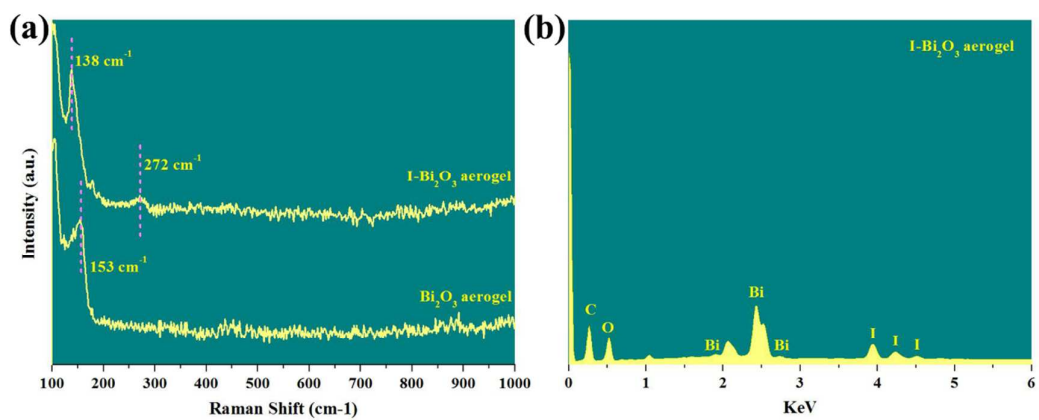

**Figure S4.** (a) Raman spectrum and energy spectrum of  $\delta$ -Bi<sub>2</sub>O<sub>3</sub> aerogel before and after I<sup>-</sup> anions adsorption. (b) The corresponding energy spectrum of I- $\delta$ -Bi<sub>2</sub>O<sub>3</sub> aerogel.

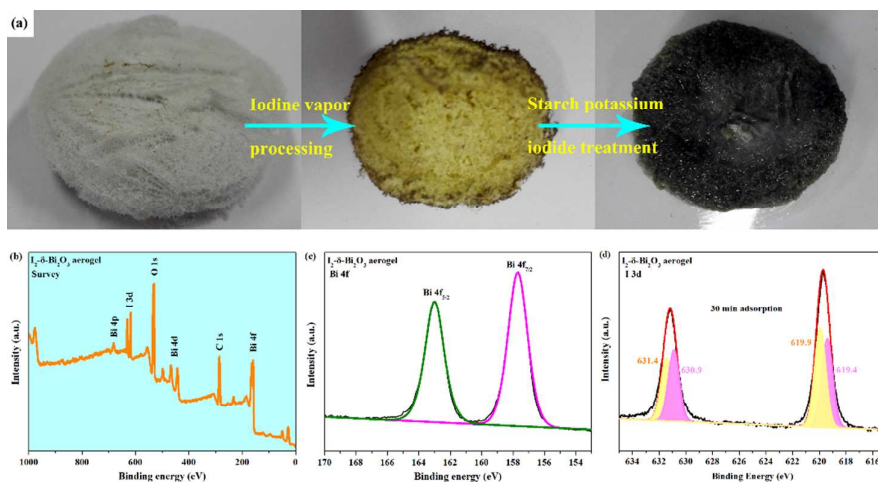

**Figure S5.** (a) Pictures of FL- $\delta$ -Bi<sub>2</sub>O<sub>3</sub> aerogel treated with iodine vapor and starch potassium iodide solution (b-d) XPS spectrum of FL- $\delta$ -Bi<sub>2</sub>O<sub>3</sub> aerogel after captured a great number of I<sub>2</sub>.

**Table S1.** Comparison of several iodide sorption materials that already reported.

| Material                                             | pH Value | Temperature<br>(°C) | Adsorption<br>capacity<br>(mmol/g) | Reference    |
|------------------------------------------------------|----------|---------------------|------------------------------------|--------------|
| Active Carbon                                        | 7        | 25                  | 1.51                               | Ref. 24      |
| Si-Fe <sub>3</sub> O <sub>4</sub>                    | 7        | 25                  | 1.11                               | Ref. 25      |
| Mg-Al(NO <sub>3</sub> )                              | 9        | 25                  | 0.30                               | Ref. 26      |
| BiOI                                                 | 7        | 25                  | -                                  | Ref. 27      |
| Cu <sub>2</sub> O                                    | 6        | 25                  | $2.0 \times 10^{-3}$               | Ref. 8       |
| Hg <sub>2</sub> S                                    | 5        | 25                  | 0.005                              | Ref. 28      |
| MR- $\delta$ -Bi <sub>2</sub> O <sub>3</sub>         | 7        | 25                  | 1.24                               | In this work |
| FL- $\delta$ -Bi <sub>2</sub> O <sub>3</sub> Aerogel | 7        | 25                  | 2.04                               | In this work |
